# Supplementary material
Source: publisher figshare collection journal article supplement (https://karger.figshare.com/ndownloader/files/35067739)
Supplement: Supplementary file 1 [file 35067739]

**Online Supplement Table 1**

| **Table 1:** Descriptive data of child behavioral problems and parenting stress for the subsample IG. | | | | | | | | | | |
| --- | --- | --- | --- | --- | --- | --- | --- | --- | --- | --- |
|  | ***M*** | ***SD*** | **HBS total** | **QCFS**  **T1** | **QCFS**  **T2** | **CBCL**  **T3** | **CBCL**  **T4** | **PSI**  **T1** | **PSI**  **T2** | **PSI**  **T3** |
| **HBS total** | 45.39 | 16.45 |  |  |  |  |  |  |  |  |
| **QCFS T1** | 1.36 | 0.27 | -.03 |  |  |  |  |  |  |  |
| **QCFS T2** | 1.44 | 0.36 | .11 | ***.37*** |  |  |  |  |  |  |
| **CBCL T3** | 0.42 | 0.21 | **.25** | .11 | **.22** |  |  |  |  |  |
| **CBCL T4** | 0.47 | 0.25 | **.21** | ***.33*** | **.24** | ***.53*** |  |  |  |  |
| **PSI T1** | 1.93 | 0.60 | .01 | ***.37*** | ***.36*** | .09 | .05 |  |  |  |
| **PSI T2** | 1.86 | 0.59 | -.03 | **.25** | ***.34*** | *.20* | .05 | ***.62*** |  |  |
| **PSI T3** | 2.03 | 0.55 | -.00 | **.22** | ***.35*** | ***.37*** | ***.35*** | ***.43*** | ***.53*** |  |
| **PSI T4** | 2.08 | 0.55 | -.01 | ***.34*** | **.24** | ***.32*** | ***.60*** | ***.28*** | ***.35*** | ***.56*** |
| *Note. HBS: “Heidelberger Belastungsskala”; QCFS: Questionnaire for Crying, Feeding and Sleeping; CBCL: Child Behavior Checklist; PSI: Parenting Stress Index; IG: Intervention Group (N = 302, nIG = 150); T1-4: child age 4 months, 6 months, 12 months, 24 months; cursive*= p<.05, two-tailed. **bold**=p<.01, two-tailed. ***bold & cursive***=p<.001, two-tailed. | | | | | | | | | | |
